# Supplementary material
Source: publisher figshare collection journal article supplement (https://sage.figshare.com/ndownloader/files/23246978)
Supplement: Supplementary file 1 [file 23246978]

**Supplementary Table I.** Follow-up modalities during the first 12 months, and handling of recurrences

|                 |                                                                                                                                                                                                                                                                                                                                                                                  |
|-----------------|----------------------------------------------------------------------------------------------------------------------------------------------------------------------------------------------------------------------------------------------------------------------------------------------------------------------------------------------------------------------------------|
| <b>Lausanne</b> | In person at 3 months, and by structured telephone interview at 12 months<br>Recurrences were ascertained by medical chart and imaging review                                                                                                                                                                                                                                    |
| <b>Athens</b>   | In person at 1, 3 and 6 months, then yearly for up to 10 years or until death.<br>For those patients unable to attend the outpatient clinic, follow-up by telephone interview with the patient or proxies, or at the patient's residence.<br>Recurrences were ascertained by reviewing the discharge letters and available investigations.                                       |
| <b>Helsinki</b> | Follow-up data on recurrences over 12 months were obtained from the national Care Register for Health Care, from the National Institute for Health and Welfare, Finland. Mortality data came from Statistics Finland. Both are prospective registries and filling in data is mandatory.<br><br>95% of the recurrent events were ascertained by reviewing actual medical records. |
| <b>Milan</b>    | In person at 1 month and 12 months (or telephone by structured interview, if not available).<br><br>Recurrences were verified by review of patient, medical charts, and imaging.                                                                                                                                                                                                 |
